# Supplementary material
Source: PubMed Central journal article supplement (PMC6656611)
Supplement: NIHMS1527688-supplement-1.pdf [file NIHMS1527688-supplement-1.pdf]

**Table S1.** Descriptive statistics of the study sample and the overall HOME Study cohort, according to selected participant covariates (The HOME Study, 2003-2006)

|                                                    | Study Sample<br>N (%) | HOME Study Cohort<br>N (%) |
|----------------------------------------------------|-----------------------|----------------------------|
| <b>Overall</b>                                     | 271                   | 389                        |
| <b>Maternal age (years)</b>                        |                       |                            |
| 18-25                                              | 53 (20)               | 96 (25)                    |
| >25-35                                             | 176 (65)              | 231 (59)                   |
| >35                                                | 42 (15)               | 62 (16)                    |
| <b>Maternal race</b>                               |                       |                            |
| Non-Hispanic White                                 | 183 (67)              | 237 (61)                   |
| Non-Hispanic Black                                 | 70 (26)               | 121 (31)                   |
| Other                                              | 18 (7)                | 26 (7)                     |
| Missing                                            |                       | 5 (1)                      |
| <b>Maternal education</b>                          |                       |                            |
| High school or less                                | 55 (20)               | 95 (24)                    |
| Tech school or some college                        | 67 (25)               | 98 (25)                    |
| Bachelors or more                                  | 149 (55)              | 191 (50)                   |
| Missing                                            |                       | 5 (1)                      |
| <b>Income</b>                                      |                       |                            |
| < \$20,000                                         | 79 (29)               | 88 (23)                    |
| \$20-40,000                                        | 99 (37)               | 65 (17)                    |
| \$40-80,000                                        | 44 (16)               | 128 (33)                   |
| > \$80,000                                         | 49 (18)               | 103 (26)                   |
| Missing                                            |                       | 5 (1)                      |
| <b>Parity</b>                                      |                       |                            |
| 0                                                  | 120 (44)              | 171 (44)                   |
| 1                                                  | 89 (33)               | 122 (31)                   |
| 2+                                                 | 62 (23)               | 92 (24)                    |
| Missing                                            |                       | 4 (1)                      |
| <b>Maternal Body Mass Index (kg/m<sup>2</sup>)</b> |                       |                            |
| < 25 (normal)                                      | 119 (44)              | 165 (42)                   |
| 25-30 (overweight)                                 | 91 (34)               | 127 (33)                   |
| >30 (obese)                                        | 61 (22)               | 95 (24)                    |
| Missing                                            |                       | 2 (1)                      |
| <b>Maternal serum cotinine (ng/mL)</b>             |                       |                            |
| < 0.015 (unexposed)                                | 107 (40)              | 139 (36)                   |
| 0.015-3 (secondhand)                               | 137 (50)              | 204 (52)                   |
| > 3 (active)                                       | 27 (10)               | 44 (11)                    |
| Missing                                            |                       | 2 (1)                      |
| <b>Delivery Type</b>                               |                       |                            |
| < 37 (preterm)                                     | 198 (73)              | 278 (72)                   |
| ≥ 37 (term)                                        | 73 (27)               | 111 (28)                   |

**Table S1.** Descriptive statistics of the study sample and the overall HOME Study cohort, according to selected participant covariates, continued (The HOME Study, 2003-2006)

|                                                                       | <b>Study Sample</b> | <b>HOME Study Cohort</b> |
|-----------------------------------------------------------------------|---------------------|--------------------------|
|                                                                       | <b>N (%)</b>        | <b>N (%)</b>             |
| <b>Overall</b>                                                        | 271                 | 389                      |
| <b>Infant sex</b>                                                     |                     |                          |
| Female                                                                | 148 (55)            | 208 (54)                 |
| Male                                                                  | 123 (45)            | 181 (46)                 |
| <b>Gestational age (weeks)</b>                                        |                     |                          |
| < 37 (preterm)                                                        | 15 (5)              | 37 (9)                   |
| ≥ 37 (term)                                                           | 256 (95)            | 352 (91)                 |
| <b>Birthweight z-score (percentile)</b>                               |                     |                          |
| < 10 <sup>th</sup> (small for gestational age)                        | 20 (7)              | 33 (9)                   |
| 10 <sup>th</sup> – 90 <sup>th</sup> (appropriate for gestational age) | 210 (78)            | 304 (78)                 |
| > 90 <sup>th</sup> (large for gestational age)                        | 41 (15)             | 52 (13)                  |

**Table S2.** Adjusted differences in childhood body mass index z-scores between age 4 weeks and 8 years by neonatal serum leptin concentration terciles: Stratified by child sex (N = 257) (The HOME Study, 2003-2006)

| <b>Leptin Tercile</b> | <b>Primary Model<br/>β (95% CI)<sup>a</sup></b> | <b>Stratified Analysis<sup>1</sup><br/>β (95% CI)<sup>b</sup></b> |                        |
|-----------------------|-------------------------------------------------|-------------------------------------------------------------------|------------------------|
|                       |                                                 | <b>Boys (N = 120)</b>                                             | <b>Girls (N = 137)</b> |
| Lowest                | Reference                                       | Reference                                                         | Reference              |
| Middle                | 0.19 (-0.06, 0.44)                              | 0.27 (-0.06, 0.59)                                                | 0.10 (-0.28, 0.48)     |
| Highest               | 0.38 (0.11, 0.64)                               | 0.47 (0.09, 0.85)                                                 | 0.25 (-0.11, 0.62)     |

Legend:

Abbreviations: CI (confidence interval), BMI (body mass index)

<sup>a</sup> Model adjusted for maternal age, race, income, parity, maternal BMI, cotinine concentrations, child age, and child sex

<sup>b</sup> Model adjusted for maternal age, race, income, parity, maternal BMI, child age, and cotinine concentrations

<sup>1</sup> Leptin x sex interaction term P-value = 0.85

**Table S3.** Adjusted annual change in childhood body mass index z-scores between age 4 weeks and 8 years by neonatal serum adiponectin concentration terciles: Stratified by child sex (N = 271) (The HOME Study, 2003-2006)

| Adiponectin Tercile | Primary Model<br>$\beta$ (95% CI) <sup>a</sup> | Stratified Analysis <sup>1</sup><br>$\beta$ (95% CI) <sup>b</sup> |                              |
|---------------------|------------------------------------------------|-------------------------------------------------------------------|------------------------------|
|                     |                                                | Boys (N = 123) <sup>2</sup>                                       | Girls (N = 148) <sup>3</sup> |
| Lowest              | 0.10 (0.08, 0.13)                              | 0.07 (0.04, 0.11)                                                 | 0.13 (0.09, 0.17)            |
| Middle              | 0.07 (0.04, 0.09)                              | 0.04 (-0.002, 0.07)                                               | 0.09 (0.05, 0.12)            |
| Highest             | 0.02 (-0.001, 0.05)                            | 0.04 (0.00, 0.07)                                                 | 0.01 (-0.02, 0.05)           |

Legend:

Abbreviations: CI (confidence interval), BMI (body mass index)

<sup>a</sup> Model adjusted for maternal age, race, income, parity, maternal BMI, cotinine concentrations, child age, child sex, and adiponectin x age interaction term (adiponectin x age interaction term P-value < 0.001)

<sup>b</sup> Model adjusted for maternal age, race, income, parity, maternal BMI, cotinine concentrations, and adiponectin x age interaction term (adiponectin x age interaction term P-value < 0.001)

<sup>1</sup> Age x sex x adiponectin interaction term P-value < 0.001

<sup>2</sup> Age x adiponectin x boy interaction term P-value = 0.19

<sup>3</sup> Age x adiponectin x girl interaction term P-value < 0.001

**Table S4.** Adjusted differences in childhood body mass index z-scores between age 4 weeks and 8 years by neonatal serum leptin concentration terciles: Sensitivity analyses (The HOME Study, 2003-2006)

| Exclusion or Adjustment        | N   | Leptin Tercile                |                            |                             |
|--------------------------------|-----|-------------------------------|----------------------------|-----------------------------|
|                                |     | Lowest<br>$\beta$ (95%<br>CI) | Middle<br>$\beta$ (95% CI) | Highest<br>$\beta$ (95% CI) |
| Primary model <sup>1</sup>     | 257 | Reference                     | 0.19 (-0.06, 0.44)         | 0.38 (0.11, 0.64)           |
| Exclude preterm births         | 243 | Reference                     | 0.18 (-0.09, 0.44)         | 0.38 (0.11, 0.66)           |
| Exclude SGA births             | 238 | Reference                     | 0.09 (-0.17, 0.35)         | 0.30 (0.02, 0.57)           |
| Exclude GDM mothers            | 247 | Reference                     | 0.19 (-0.06, 0.44)         | 0.38 (0.11, 0.64)           |
| Exclude obese mothers          | 200 | Reference                     | 0.15 (-0.10, 0.41)         | 0.29 (0.02, 0.56)           |
| Exclude 4 week measures        | 257 | Reference                     | 0.14 (-0.15, 0.43)         | 0.23 (-0.07, 0.53)          |
| Adjust for birthweight z-score | 257 | Reference                     | -0.10 (-0.32, 0.15)        | -0.08 (-0.34, 0.19)         |
| Adjust for GWG z-score         | 255 | Reference                     | 0.14 (-0.11, 0.40)         | 0.31 (0.04, 0.58)           |
| Adjust for OGTT                | 239 | Reference                     | 0.28 (0.01, 0.55)          | 0.36 (0.07, 0.64)           |

Legend:

Abbreviations: SGA (small for gestational age, defined as gestational age- and sex-standardized birthweight z-score < 10<sup>th</sup> percentile), GDM (gestational diabetes mellitus), GWG (gestational weight gain), OGTT (oral glucose tolerance test, non-fasting maternal glucose concentrations), CI (confidence interval)

<sup>1</sup> Model adjusted for maternal age, race, income, parity, maternal body mass index, cotinine concentrations, child age, and child sex

**Table S5.** Adjusted annual change in childhood body mass index z-scores between age 4 weeks and 8 years by neonatal serum adiponectin concentration tertiles: Sensitivity analyses (The HOME Study, 2003-2006)

| <b>Exclusion or Adjustment</b> | <b>N</b> | <b>Adiponectin Tertile</b>   |                              |                               |
|--------------------------------|----------|------------------------------|------------------------------|-------------------------------|
|                                |          | <b>Lowest<br/>β (95% CI)</b> | <b>Middle<br/>β (95% CI)</b> | <b>Highest<br/>β (95% CI)</b> |
| Primary model <sup>1</sup>     | 271      | 0.10 (0.08, 0.13)            | 0.07 (0.04, 0.09)            | 0.02 (-0.001, 0.05)           |
| Exclude preterm births         | 256      | 0.09 (0.06, 0.12)            | 0.07 (0.04, 0.09)            | 0.02 (-0.004, 0.05)           |
| Exclude SGA births             | 251      | 0.11 (0.08, 0.14)            | 0.06 (0.03, 0.09)            | 0.02 (-0.01, 0.04)            |
| Exclude GDM mothers            | 259      | 0.10 (0.08, 0.13)            | 0.07 (0.04, 0.09)            | 0.02 (-0.001, 0.05)           |
| Exclude obese mothers          | 210      | 0.07 (0.04, 0.10)            | 0.04 (0.02, 0.07)            | 0.03 (-0.001, 0.05)           |
| Exclude 4 week measures        | 271      | 0.05 (0.02, 0.08)            | 0.04 (0.01, 0.06)            | -0.01 (-0.04, 0.02)           |
| Adjust for birthweight z-score | 271      | 0.10 (0.08, 0.13)            | 0.07 (0.04, 0.09)            | 0.02 (-0.001, 0.05)           |
| Adjust for GWG z-score         | 269      | 0.11 (0.08, 0.13)            | 0.07 (0.04, 0.09)            | 0.02 (-0.001, 0.05)           |
| Adjust for OGGT                | 239      | 0.09 (0.06, 0.12)            | 0.07 (0.05, 0.09)            | 0.03 (0.001, 0.05)            |

Legend:

Abbreviations: SGA (small for gestational age, defined as gestational age- and sex-standardized birthweight z-score < 10<sup>th</sup> percentile), GDM (gestational diabetes mellitus), GWG (gestational weight gain), OGGT (oral glucose tolerance test, non-fasting maternal glucose concentrations), CI (confidence interval)

<sup>1</sup> Model adjusted for maternal age, race, income, parity, maternal body mass index, cotinine concentrations, child age, child sex, and adiponectin x age interaction term (adiponectin x age interaction term P-value < 0.001)
